# Supplementary material
Source: Springer Nature journal article supplement (https://www.springermedizin.de/resource/supplementary/12889_2013_6823_MOESM1_ESM.pdf/9499106)

multimorbidity less frequent

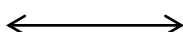

multimorbidity more frequent

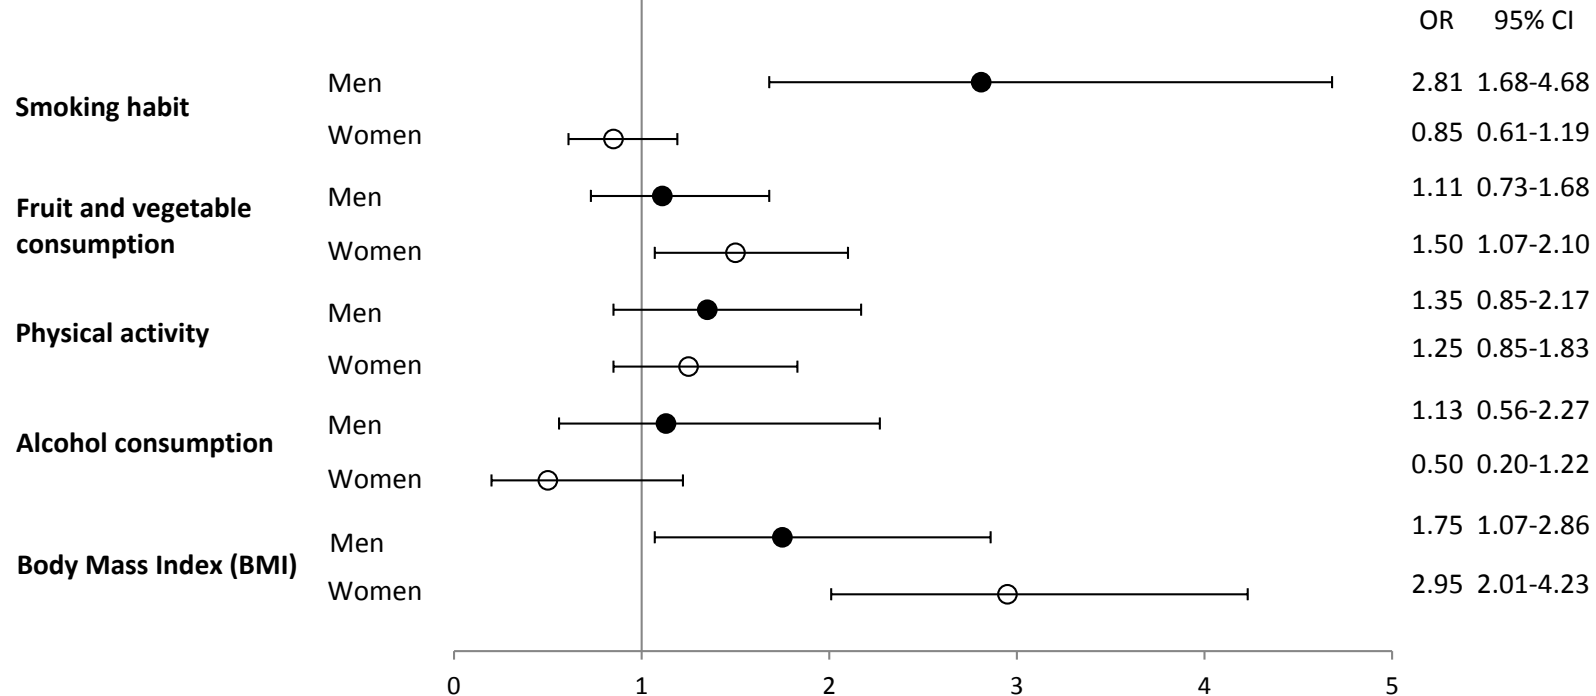

Supplement: MOESM1 [file 9499106]
